# Supplementary material
Source: PubMed Central journal article supplement (PMC8772078)

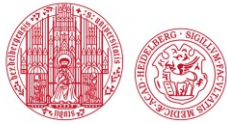

# MEDIZINISCHE FAKULTÄT HEIDELBERG

Ethikkommission der Med. Fak. HD | Alte Glockengießerei 11/1 | 69115 Heidelberg

Herrn Prof. Dr. med. Dipl. Soz. Joachim Szecsenyi  
Universitätsklinikum Heidelberg  
Abt. Allgemeinmedizin und Versorgungsforschung  
Im Neuenheimer Feld 130.3  
Marsilius Arkaden, Turm West  
69120 Heidelberg

27.08.2021  
-si

## CONFIRMATION

**Reference No:** **S-608/2021**

**Title:** Cluster-randomisierte kontrollierte Interventionsstudie zur Evaluation der Implementierung eines evidenzbasierten und patientenorientierten Versorgungskonzepts für die Behandlung des Ulcus cruris venosum in der Hausarztpraxis („Ulcus Cruris Care“)

Dear Professor Szecsenyi,

We hereby confirm that the above-mentioned research project has been reviewed and approved by the Ethics Committee of the Medical Faculty of the University of Heidelberg. The approval of the Ethics Committee (Berufsrechtliche Beratung), dated to 05.08.2021, has been sent to you on 05.08.2021.

Kind regards

Dr. rer. nat. Sylke Siebrecht  
Sonstige Studien

## Universität Heidelberg Ethikkommission der Med. Fakultät

Alte Glockengießerei 11/1  
69115 Heidelberg

Tel. +49 6221 56264-60 (Zentrale)  
Fax +49 6221 56264-80  
ethikkommission-l@med.uni-heidelberg.de

[www.medizinische-fakultaet-hd.uni-heidelberg.de/ethikkommission](http://www.medizinische-fakultaet-hd.uni-heidelberg.de/ethikkommission)

### Vorsitz:

Prof. Dr. med. Dr. h.c. Thomas Strowitzki

### Stellv. Vorsitz:

Prof. Dr. med. Klaus Herfarth

### Geschäftsleitung:

Dr. med. Verena Pfeilschifter

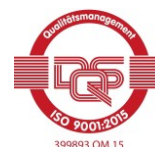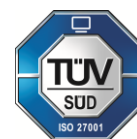

BIC SOLADEST600  
IBAN DE64 6005 0101 7421 5004 29

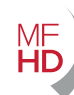

Supplement: 13063_2021_5944_MOESM3_ESM.pdf [file 13063_2021_5944_MOESM3_ESM.pdf]
