# Supplementary material
Source: PubMed Central journal article supplement (PMC8772078)
Supplement: 13063_2021_5944_MOESM4_ESM.pdf [file 13063_2021_5944_MOESM4_ESM.pdf]

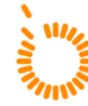

**Gemeinsamer  
Bundesausschuss**  
Innovationsausschuss

**Geschäftsstelle**

Innovationsausschuss beim G-BA, Postfach 12 06 06, 10596 Berlin

Prof. Dr. Joachim Szecsenyi  
Universitätsklinikum Heidelberg  
Abteilung Allgemeinmedizin und  
Versorgungsforschung  
Im Neuenheimer Feld 130.3  
69120 Heidelberg

**Besuchsadresse:**  
Gutenbergstraße 13  
10587 Berlin

**Ansprechpartner/in:**  
Dr. Annelie Brendel

**E-Mail:**  
Annelie.brendel@if.g-ba.de

**Internet:**  
www.if.g-ba.de

**Unser Zeichen:**  
01VSF19043

**Datum:**  
1. September 2021

## **Confirmation government funding and assessment corresponding to a peer-review**

Dear Professor Szecsenyi,

we hereby confirm that the project „ULCUS CRURIS CARE – Etablierung eines patientenorientierten und evidenzbasierten Versorgungskonzeptes für die Therapie des Ulcus cruris venosum in der Hausarztpraxis“ is funded by the German Innovation Fund with the funding number: 01VSF19043.

Projects funded by the German Innovation Fund run through an assessment procedure that correspond to a peer-review.

Details of the assessment procedure are described in § 9 of the Code of procedure of the council of the German Innovation Fund: [https://innovationsfonds.g-ba.de/downloads/media/6/Verfahrensordnung\\_Innovationsausschuss\\_2015-12-14.pdf](https://innovationsfonds.g-ba.de/downloads/media/6/Verfahrensordnung_Innovationsausschuss_2015-12-14.pdf)

The application for „Ulcus Cruris Care“ was assessed by a council of experts and finally (under consideration of the results of the experts) of the council of the German Innovation Fund (both councils existing of 10 members).

The council of the German Innovation Fund is located at the Federal Joint Committee (G-BA)<sup>1</sup>. The Federal Joint Committee is the highest decision-making body of the joint self-government of physicians, dentists, hospitals and health insurance funds in Germany. It issues directives for the benefit catalogue of the statutory health insurance funds (GKV) for more than 73 million insured persons and thus specifies which services in medical care reimbursed by the GKV.

The documentation of the Ulcus Cruris Care project is accessible on the website of the funding body:

[ULCUS CRURIS CARE – Etablierung eines patientenorientierten und evidenzbasierten Versorgungskonzeptes für die Therapie des Ulcus cruris venosum in der Hausarztpraxis - G-BA Innovationsfonds](#)

Please contact us if additional questions arise.

Sincerely yours,

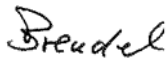

Dr. Annelie Brendel

---

<sup>1</sup> in German: Innovationsausschuss beim Gemeinsamen Bundesausschuss.
